# Supplementary material
Source: PubMed Central journal article supplement (PMC6744868)
Supplement: pnas.1908624116.sapp.pdf [file pnas.1908624116.sapp.pdf]

1

## 2 **Supplementary Information for**

### 3 **Lazy electrons in graphene: a time-dependent tight-binding study**

4 **Vaibhav Mohanty and Eric J. Heller**

5 **Vaibhav Mohanty. E-mail: [mohanty@alumni.harvard.edu](mailto:mohanty@alumni.harvard.edu).**

6 **Eric J. Heller. E-mail: [eheller@fas.harvard.edu](mailto:eheller@fas.harvard.edu).**

#### 7 **This PDF file includes:**

8     Supplementary text

9     Figs. S1 to S4

10    References for SI reference citations

## 11 Supporting Information Text

### 12 Theory and Model

13 **Adiabatic Born-Oppenheimer Approximation.** Here we discuss the Born-Oppenheimer approximation, the adiabatic case, and  
14 its application to the time-dependent Hamiltonian  $\hat{H}(t)$  constructed previously. For a particular nuclear configuration, the  
15 time-independent Schrödinger equation for the molecular wavefunction can be written as

$$16 \quad H(\mathbf{R}, \mathbf{r})\Psi^{(\alpha)}(\mathbf{R}, \mathbf{r}) = E_\alpha \Psi^{(\alpha)}(\mathbf{R}, \mathbf{r}), \quad [1]$$

17 where  $n$  indexes the molecular eigenstate, and the Hamiltonian is divided into electronic kinetic, nuclear kinetic, and interaction  
18 potential terms  $H(\mathbf{R}, \mathbf{r}) = T_{\text{el}}(\mathbf{r}) + T_{\text{nu}}(\{\mathbf{R}\}) + V(\mathbf{R}, \mathbf{r})$ . We can separate the molecular wavefunction into electronic and  
19 nuclear parts such that

$$20 \quad \Psi^{(\alpha)}(\mathbf{R}, \mathbf{r}) = \sum_{n,m} b_{n,m}^{(\alpha)} \psi_n(\mathbf{R}; \mathbf{r}) \chi_{n,m}(\mathbf{R}), \quad [2]$$

21 where  $\psi_n(\mathbf{R}; \mathbf{r})$  is the  $n$ -th electronic eigenstate parametrized by the nuclear configuration  $\{\mathbf{R}\}$ , and  $\chi_{n,m}(\mathbf{R})$  is a nuclear  
22 wavefunction. Note that no approximation has been used here, the functions  $\psi_n(\mathbf{R}; \mathbf{r})$  form an eigenbasis for the electronic  
23 degrees of freedom, and they independently satisfy the time-independent Schrödinger equation for the electron kinetic and  
24 interaction potential terms:

$$25 \quad (T_e(\mathbf{r}) + V(\mathbf{R}, \mathbf{r}))\psi_n(\mathbf{R}; \mathbf{r}) = E_n(\{\mathbf{R}\})\psi_n(\mathbf{R}; \mathbf{r}). \quad [3]$$

26 We note that the function  $E_n(\{\mathbf{R}\})$  maps out an adiabatic potential energy surface for different nuclear configurations  $\{\mathbf{R}\}$ .  
27 There are  $N$  potential energy surfaces, where  $N$  is the number of atoms per unit cell. Sometimes adjacent potential energy  
28 surfaces touch at a *conical intersection*, or they nearly touch at an *avoided crossing*. At these points, the character of the  
29 associated wavefunctions are known to change rapidly (1, 2), and this phenomenon will be increasingly important in the  
30 time-dependent simulation.

31 Discarding terms that depend on spatial derivatives of the electronic wavefunction, the electronic basis states labeled  
32 by  $n$  become independent, making  $n$  and  $m$  “good” quantum numbers. The ABO molecular wavefunction  $\Psi^{(\alpha)}(\mathbf{R}, \mathbf{r})$  is  
33 labeled  $\Psi^{(\alpha)}(\mathbf{R}, \mathbf{r}) \mapsto \Psi^{(n,m)}(\mathbf{R}, \mathbf{r}) = \psi_n(\mathbf{R}; \mathbf{r}) \chi_{n,m}(\mathbf{R})$ . We focus on the electronic part  $\psi_n(\mathbf{R}; \mathbf{r})$ , which, within the ABO  
34 approximation, is a stationary state. We write the Hamiltonian operator in the equation 3 as  $\hat{H}(t)$ , where the matrix elements  
35 are given by the tight-binding formulation.

36 Bands fold into the Brillouin zone when a supercell is used for calculating band structure; clustering of the bands is a  
37 result of degeneracy breaking due to the inclusion of vibrations in the classical model of the nuclear degrees of freedom. In  
38 principle, the supercell size could increase indefinitely—or to the size of the very large sample—causing the bands to fold into  
39 an increasingly smaller Brillouin zone. Our results indicate that *adiabatic* electronic states beginning in a cluster decay very  
40 quickly, regardless of supercell size. *Diabatic* electronic states beginning in a cluster experience a decaying autocorrelation over  
41 the course of several vibrational periods. For graphene, which has many peaks in its density of states (and hence many band  
42 clusters regardless of supercell size), the ABO approximation provides an poor picture of electronic time evolution. Rather, all  
43 indications are that a diabatic description where the electronic wavefunction changes little as the nuclei move is much superior.

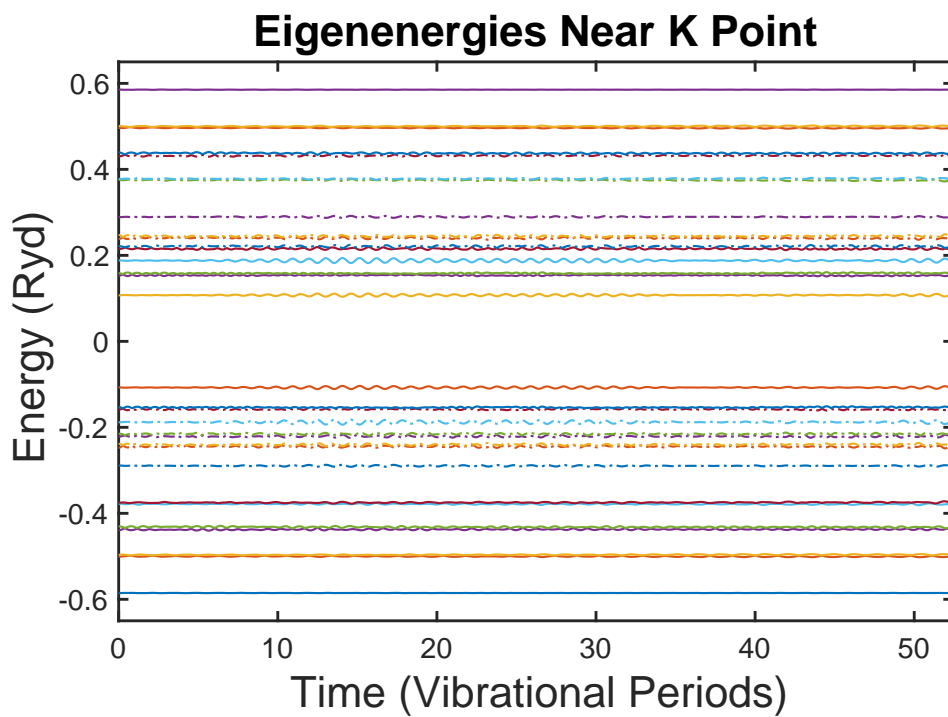

**Fig. S1.** Time-dependent energy spectrum  $E_{\mathbf{k}_e}(t)$  near the K point. On the abscissa, we have plotted time in terms the number of cycles of the shortest vibrational mode, where the shortest vibrational period in our  $N = 32$  atom simulation is  $190.679 \hbar/\text{Ryd}$ .

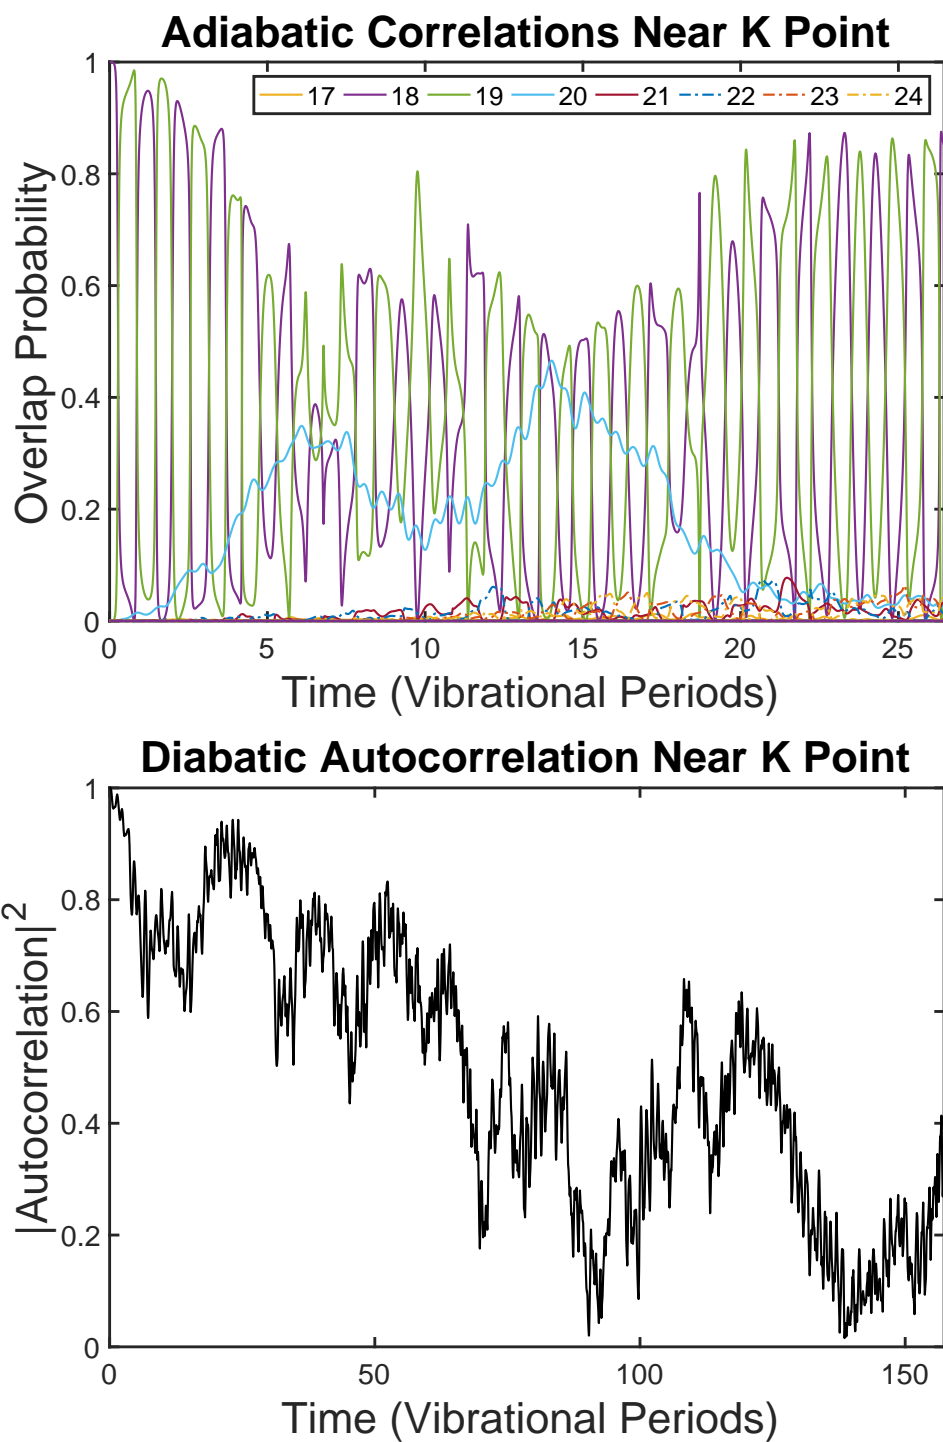

**Fig. S2.** The overlap probability  $P_{k_e}(t)$  (top) and magnitude squared of the autocorrelation  $A_{k_e}(t)$  for the electronic state starting in the ABO band  $n = 18$ , showing the dramatically better persistence of a diabatic-like autocorrelation over an adiabatic one (bottom). Note the six-fold expansion of the time range (abscissa) on the bottom. On the abscissa, we have plotted time in terms the number of cycles of the shortest vibrational mode, where the shortest vibrational period in our  $N = 32$  atom simulation is  $190.679 \hbar/\text{Ryd}$ .

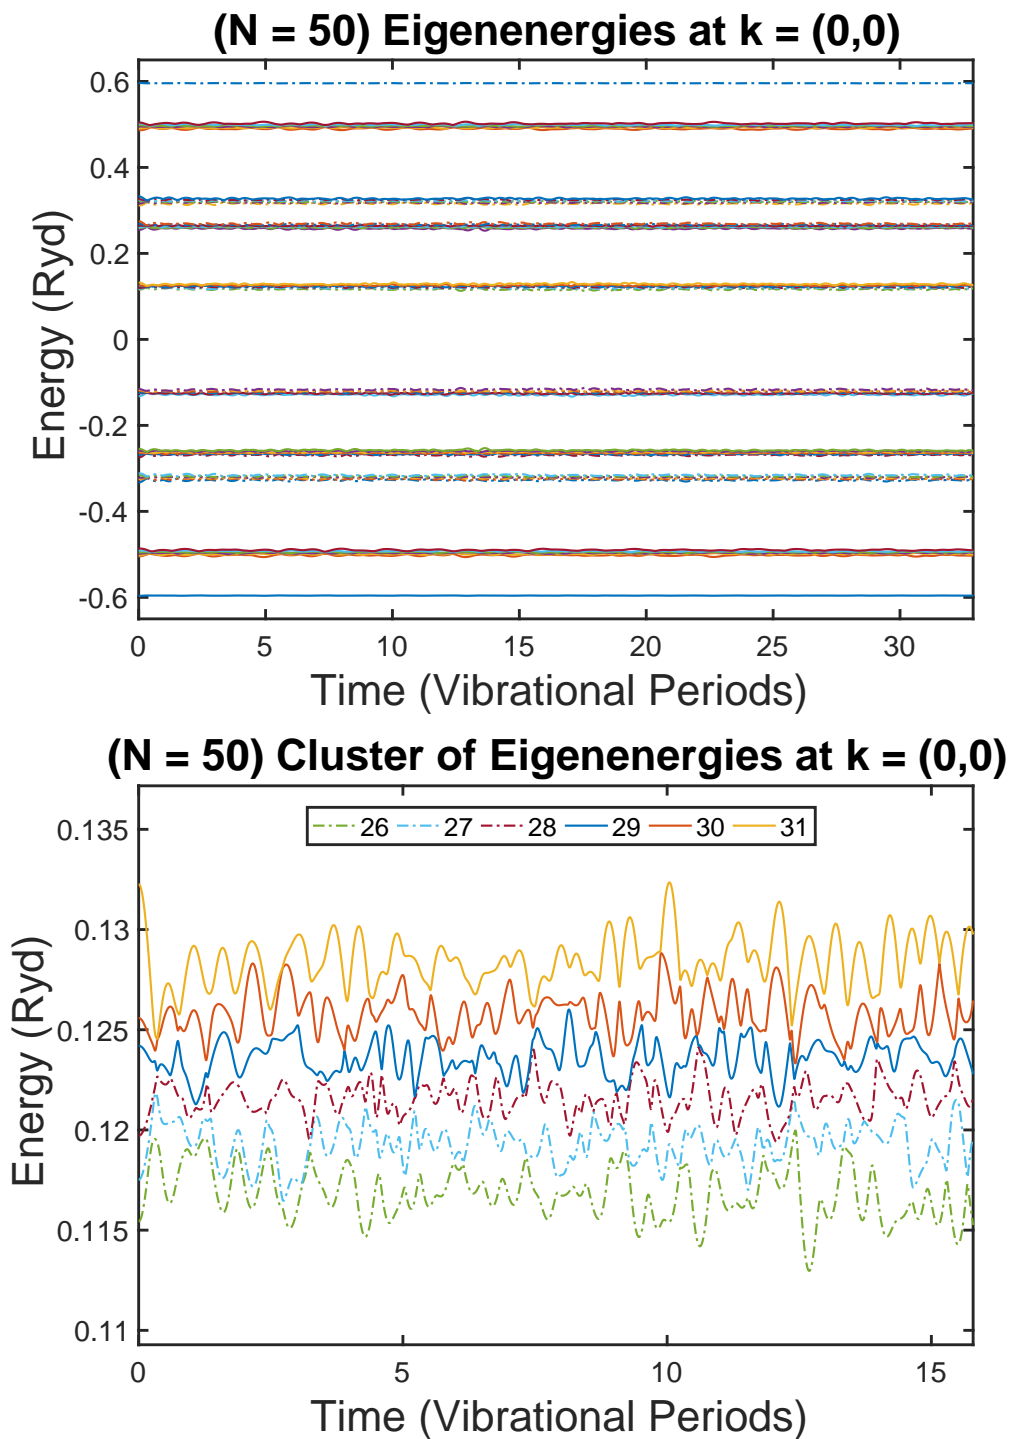

**Fig. S3.** Time-dependent energy spectrum  $E_n(t)$  at the  $\Gamma$  point, where  $\mathbf{k} = (0, 0)$ : (left) the full spectrum and (right) the cluster containing band  $n = 27$ . On the abscissa, we have plotted time in terms the number of cycles of the shortest vibrational mode, where the shortest vibrational period in our  $N = 50$  atom simulation is  $202.755 \hbar/\text{Ryd}$ .

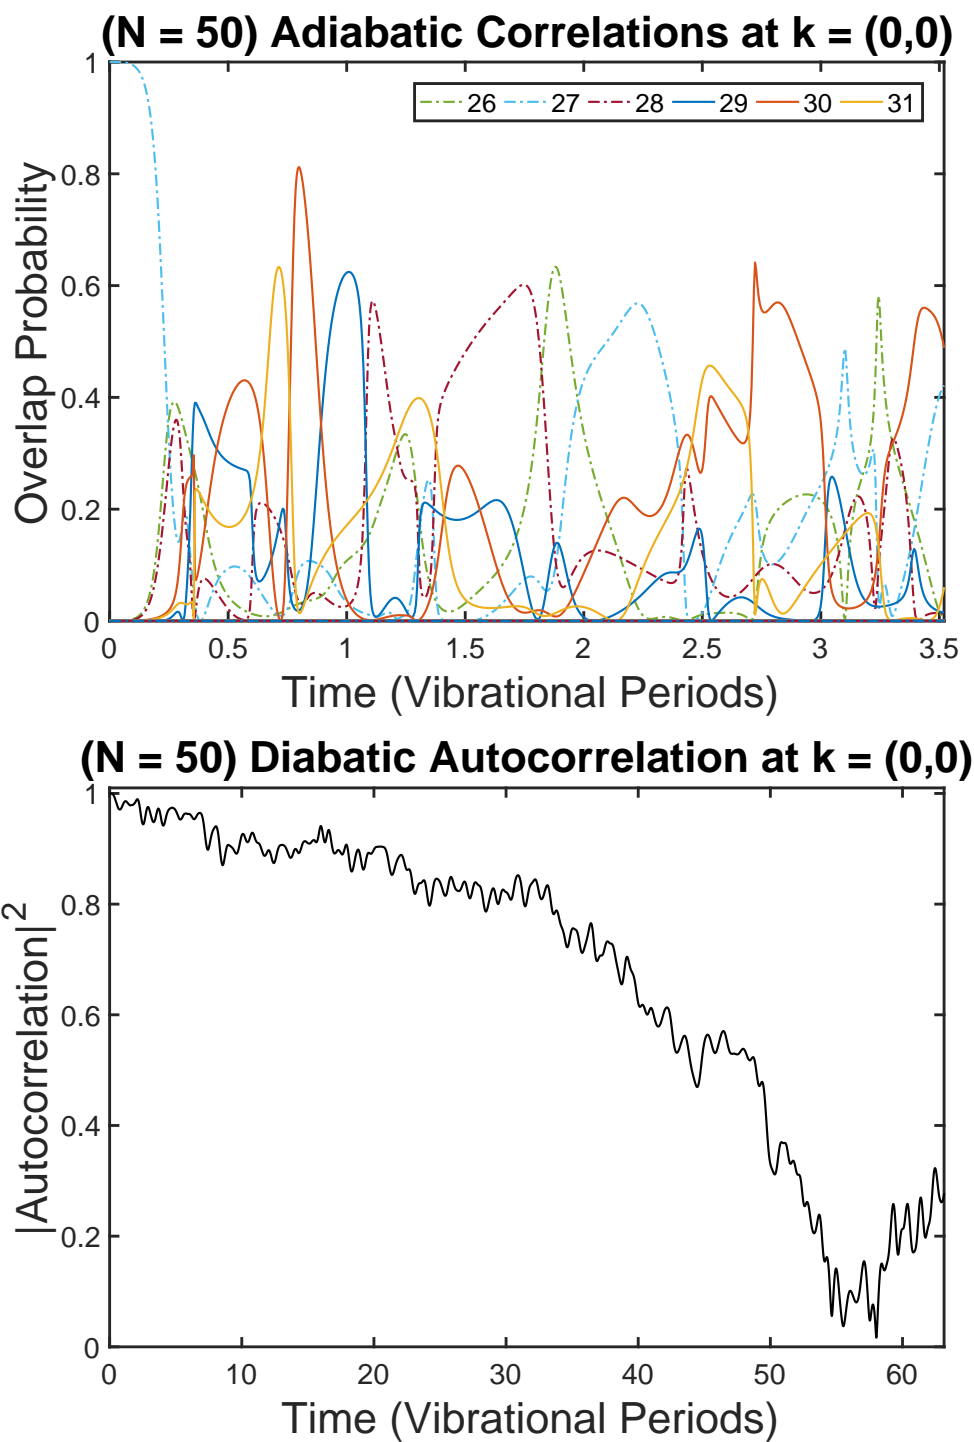

**Fig. S4.** The overlap probability  $P_{\mathbf{k}_e}(t)$  (top) and magnitude squared of the autocorrelation  $A_{\mathbf{k}_e}(t)$  for the electronic state starting in the ABO band  $n = 27$ , showing the dramatically better persistence of a diabatic-like autocorrelation over an adiabatic one (bottom). Note the six-fold expansion of the time range (abscissa) on the bottom. On the abscissa, we have plotted time in terms the number of cycles of the shortest vibrational mode, where the shortest vibrational period in our  $N = 50$  atom simulation is  $202.755 \hbar/\text{Ryd}$ .

44 **References**

- 45 1. Albert J, Hader K, Engel V (2017) Coupled electron-nuclear quantum dynamics through and around a conical intersection.  
46 *The Journal of Chemical Physics* 147(6):064302.
- 47 2. Heller EJ (2018) *The semiclassical way to dynamics and spectroscopy*. (Princeton University Press, Princeton, New Jersey).
